# Supplementary material for: The Neural Signatures of Shame, Embarrassment, and Guilt: A Voxel-Based Meta-Analysis on Functional Neuroimaging Studies
Source: MDPI journal article supplement (doi:10.3390/brainsci13040559), 2023-03-26
Supplement: s1 [file s1]

**Table S1. Specific contribution of each study to cluster formation**

| Analysis            | Cluster | Contributors                                                                                                                                                                                                                                                                                                                                                                                                                                                  |
|---------------------|---------|---------------------------------------------------------------------------------------------------------------------------------------------------------------------------------------------------------------------------------------------------------------------------------------------------------------------------------------------------------------------------------------------------------------------------------------------------------------|
| Shame/embarrassment | 1       | 1 foci from Berthoz et al., 2002<br>1 foci from Finger et al., 2006<br>2 foci from Krach et al., 2011<br>1 foci from Krach et al., 2015<br>1 foci from Laneri et al., 2017<br>1 foci from Mayer et al., 2020<br>1 foci from Michl et al., 2014<br>3 foci from Morita et al., 2012<br>1 foci from Morita et al., 2016<br>1 foci from Morita et al., 2008<br>1 foci from Morita et al., 2014<br>1 foci from Wagner et al., 2011<br>1 foci from Zhu et al., 2018 |
|                     | 2       | 2 foci from Krach et al., 2011<br>1 foci from Krach et al., 2015<br>1 foci from Laneri et al., 2017<br>2 foci from Mayer et al., 2020<br>1 foci from Morita et al., 2012<br>1 foci from Stroth et al., 2019                                                                                                                                                                                                                                                   |
|                     | 3       | 1 foci from Melchers et al., 2017<br>1 foci from Morita et al., 2012<br>1 foci from Morita et al., 2016<br>1 foci from Morita et al., 2008<br>1 foci from Morita et al., 2014                                                                                                                                                                                                                                                                                 |
|                     | 4       | 1 foci from Morita et al., 2012<br>1 foci from Morita et al., 2016<br>1 foci from Morita et al., 2008<br>1 foci from Morita et al., 2014                                                                                                                                                                                                                                                                                                                      |
|                     | 5       | 1 foci from Krach et al., 2011<br>1 foci from Krach et al., 2015<br>1 foci from Laneri et al., 2017<br>1 foci from Morita et al., 2012                                                                                                                                                                                                                                                                                                                        |
| Guilt               | 1       | 1 foci from Dominguez et al., 2018<br>1 foci from Fourie et al., 2014<br>1 foci from Gradin et al., 2016<br>1 foci from Molenberghs et al., 2015<br>1 foci from Peth et al., 2015<br>1 foci from Zhu et al., 2018                                                                                                                                                                                                                                             |
|                     | 2       | 1 foci from Green et al., 2012<br>1 foci from Kédia et al., 2008<br>1 foci from Takahashi et al., 2004<br>1 foci from Wagner et al., 2011                                                                                                                                                                                                                                                                                                                     |

The table reports the contributors to each cluster.
